# Supplementary material for: Phosphate acquisition efficiency in wheat is related to root:shoot ratio, strigolactone levels, and PHO2 regulation
Source: PubMed Central journal article supplement — J Exp Bot. 2019 Jul 30;70(20):5631–42. doi: 10.1093/jxb/erz349 (PMC6812720; doi:10.1093/jxb/erz349), 2019-07-30
Supplement: erz349_suppl_supplementary_tables_s1-s3_figures_s1-s6.pdf [file erz349_suppl_supplementary_tables_s1-s3_figures_s1-s6.pdf]

**Table S1.** Selected chemical properties of the Gorbea series soils used in the rhizobox experiment

|                                                   |      |
|---------------------------------------------------|------|
| Available P (mg kg <sup>-1</sup> ) <sup>A</sup>   | 17.4 |
| Total P (mg kg <sup>-1</sup> ) <sup>B</sup>       | 3910 |
| Organic P (mg kg <sup>-1</sup> ) <sup>C</sup>     | 1870 |
| pH <sup>D</sup>                                   | 4.92 |
| Organic matter (%) <sup>E</sup>                   | 11.4 |
| Exchangeable cations (cmol(+) kg <sup>-1</sup> ): |      |
| K <sup>F</sup>                                    | 0.31 |
| Na <sup>F</sup>                                   | 0.04 |
| Ca <sup>F</sup>                                   | 0.91 |
| Mg <sup>F</sup>                                   | 0.34 |
| Al <sup>G</sup>                                   | 0.32 |
| Al saturation (%)                                 | 16.7 |
| Base saturation (cmol(+) kg <sup>-1</sup> )       | 1.6  |

All analytical techniques were carried out according to the Normalisation and Accreditation Commission of the Chilean Soil Science Society (Sadzawka *et al.*, 2006). ECEC, Effective cation exchange capacity. <sup>A</sup> Extractable by Olsen method. <sup>B</sup> Determined by soil oxidation with sodium hypobromite. <sup>C</sup> Determined by Hedley fractionation procedure. <sup>D</sup> Measured in H<sub>2</sub>O. <sup>E</sup> Walkley–Black method. <sup>F</sup> Extracted by 1 M ammonium acetate. <sup>G</sup> Extracted by 1M potassium chloride.

**Table S2.** Primer sequences used in the real-time qPCR analysis.

| Gene               | primer (5' → 3')                                       | °C | Reference                   |
|--------------------|--------------------------------------------------------|----|-----------------------------|
| <i>TaPht1;2a/b</i> | CGACACCATTGCTCCGACTG<br>TCAARCACACCAACMATGCACG         | 58 | Grün <i>et al.</i> (2017)   |
| <i>TaPht1;10</i>   | CTAACTCTGACGCCCAAGAG<br>CGGAACTGCTTATGCGTSG            | 58 | Grün <i>et al.</i> (2017)   |
| <i>TaIPS1</i>      | CAGTACCAGCTGCATGCCTG<br>CTAGCCAACGCCGGATCCA            | 58 | Ouyang <i>et al.</i> (2016) |
| <i>Tae-miR399</i>  | GGAGGCATGCATGTACTIONGATG<br>GGCAATTCTCCTTTGGCACG       | 58 | Ouyang <i>et al.</i> (2016) |
| <i>TaPHO2</i>      | GGAGAAGAAGTCCATCACGTACAACG<br>GGCAAGTGAAGTGCTCCTTGACGA | 54 | Ouyang <i>et al.</i> (2016) |
| <i>TaPHO1</i>      | GAGTGGCTACCACAAATTGAATC<br>TATTTTTACATCCATGTCAAAGGTG   | 58 | Ouyang <i>et al.</i> (2016) |
| <i>TaD27</i>       | CATGTGAGGTCAGGGAATCTG<br>TCATCTCGCAGCTCATGTCT          | 55 | This work                   |
| <i>TaCCD8</i>      | AAGGGCTCCATCGTCGTC<br>CAGCGTCCAGAGGTCGGTGTC            | 58 | This work                   |
| <i>TaPHO2 1A</i>   | GTATAAGGATGATGGAATTGAAGTA<br>CATTCTTAGTACTCTCATGGTGAT  | 55 | Ouyang <i>et al.</i> (2016) |
| <i>TaPHO2 1B</i>   | GGTTTAGCTTCAGTCTGTGTCAG<br>CAGCCTTTGAACAGCGGTC         | 58 | Ouyang <i>et al.</i> (2016) |
| <i>TaPHO2 1D</i>   | CTCGGCGGTGATCTCATTG<br>AGGCGATCCCAGCTTCGC              | 58 | Ouyang <i>et al.</i> (2016) |
| <i>TahnRNPQ</i>    | TCACCTTCGCCAAGCTCAGAACTA<br>AGTTGAACTTGCCCGAAACATGCC   | 58 | Grün <i>et al.</i> (2017)   |

**Table S3.** Effects of Pi starvation in Crac and Tukan grown in hydroponics. Plants were grown in Pi-sufficient conditions (200  $\mu\text{M}$ ) for 2 weeks, and then half of them subjected to Pi deprivation (10  $\mu\text{M}$ ) for 3 weeks. Values (%) of growth rate, root system architecture, and Pi acquisition were calculated as the difference between individual plants in both conditions. Asterisks indicate the significance of differences between the genotypes in the same condition, as determined by Student's t test analysis: \*  $P < 0.05$ , \*\*\*  $P < 0.001$ .

| cv             | Shoot Weight | Root Weight | Total Weight | Root: Shoot | Root Length | Root Area | Shoot P (mg) | Shoot P ( $\text{mg}\cdot\text{g}^{-1}$ ) | Root P (mg) | Root P ( $\text{mg}\cdot\text{g}^{-1}$ ) | Plant P (mg) | Plant P ( $\text{mg}\cdot\text{g}^{-1}$ ) |
|----------------|--------------|-------------|--------------|-------------|-------------|-----------|--------------|-------------------------------------------|-------------|------------------------------------------|--------------|-------------------------------------------|
| Crac           | -23%         | 59%         | -11%         | 128%        | 113%        | 98%       | -46%         | -25%                                      | -34%        | -49%                                     | -46%         | -36%                                      |
| Tukan          | -37%         | 31%         | -26%         | 87%         | 80%         | 77%       | -57%         | -36%                                      | -48%        | -60%                                     | -57%         | -45%                                      |
| <i>p-value</i> | *            | *           | ***          | *           | *           | *         | *            | n.s.                                      | *           | *                                        | *            | *                                         |

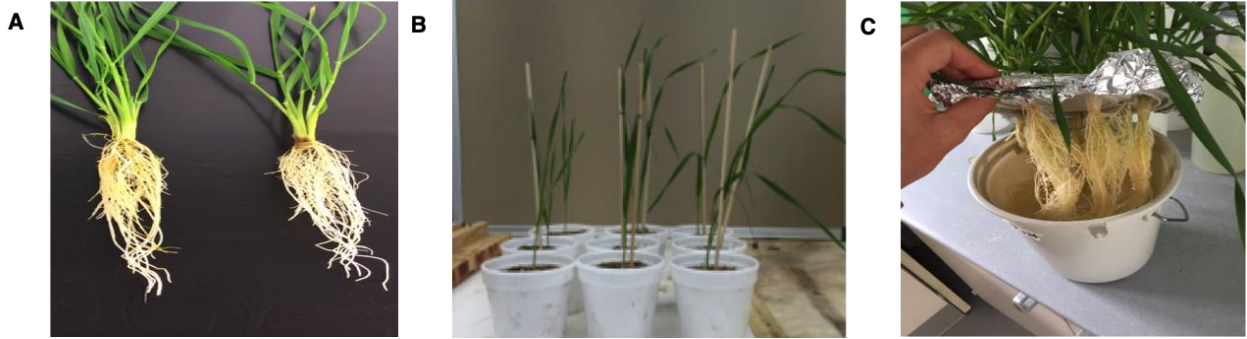

**Fig. S1.** Growth performance wheat plants under different experimental conditions. (A) Hydroponically and (B) pot grown plants for phenotyping experiments; and (C) hydroponically grown plants for molecular analysis.

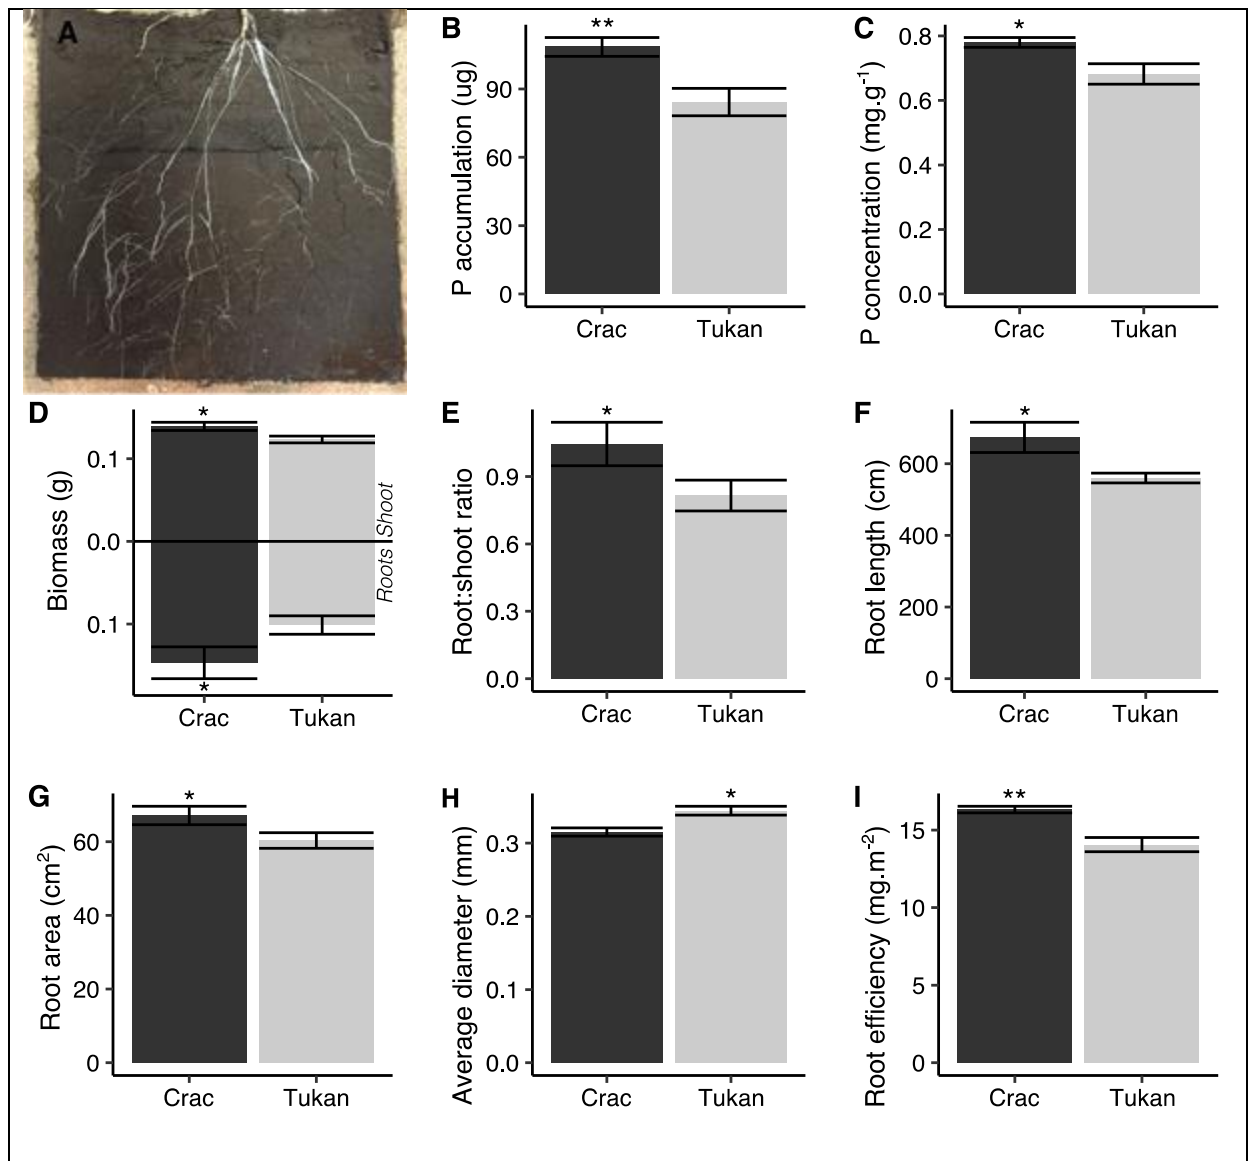

**Fig. S2.** Rhizobox experiment to analyze the effect of Pi starvation in Crac (dark bars) and Tukan (light bars). Plants were grown for 8 weeks in a high P-fixing acidic soil without Pi addition. (A) Visual representation of rhizobox growth system; (B) Shoot Pi accumulation; (C) Shoot Pi concentration; (D) Shoot and root biomass production; (E) Root-to-shoot ratio; (F) Total root length; (G) Root area; (H) Average root diameter; and (I) Root efficiency in Shoot Pi accumulation. Data represent the means of five independent replicates ( $\pm$ SE). Asterisks indicate the significance of differences between the genotypes, as determined by Student's t test analysis: \*  $P < 0.05$ , \*\*  $P < 0.01$ , \*\*\*  $P < 0.001$ .

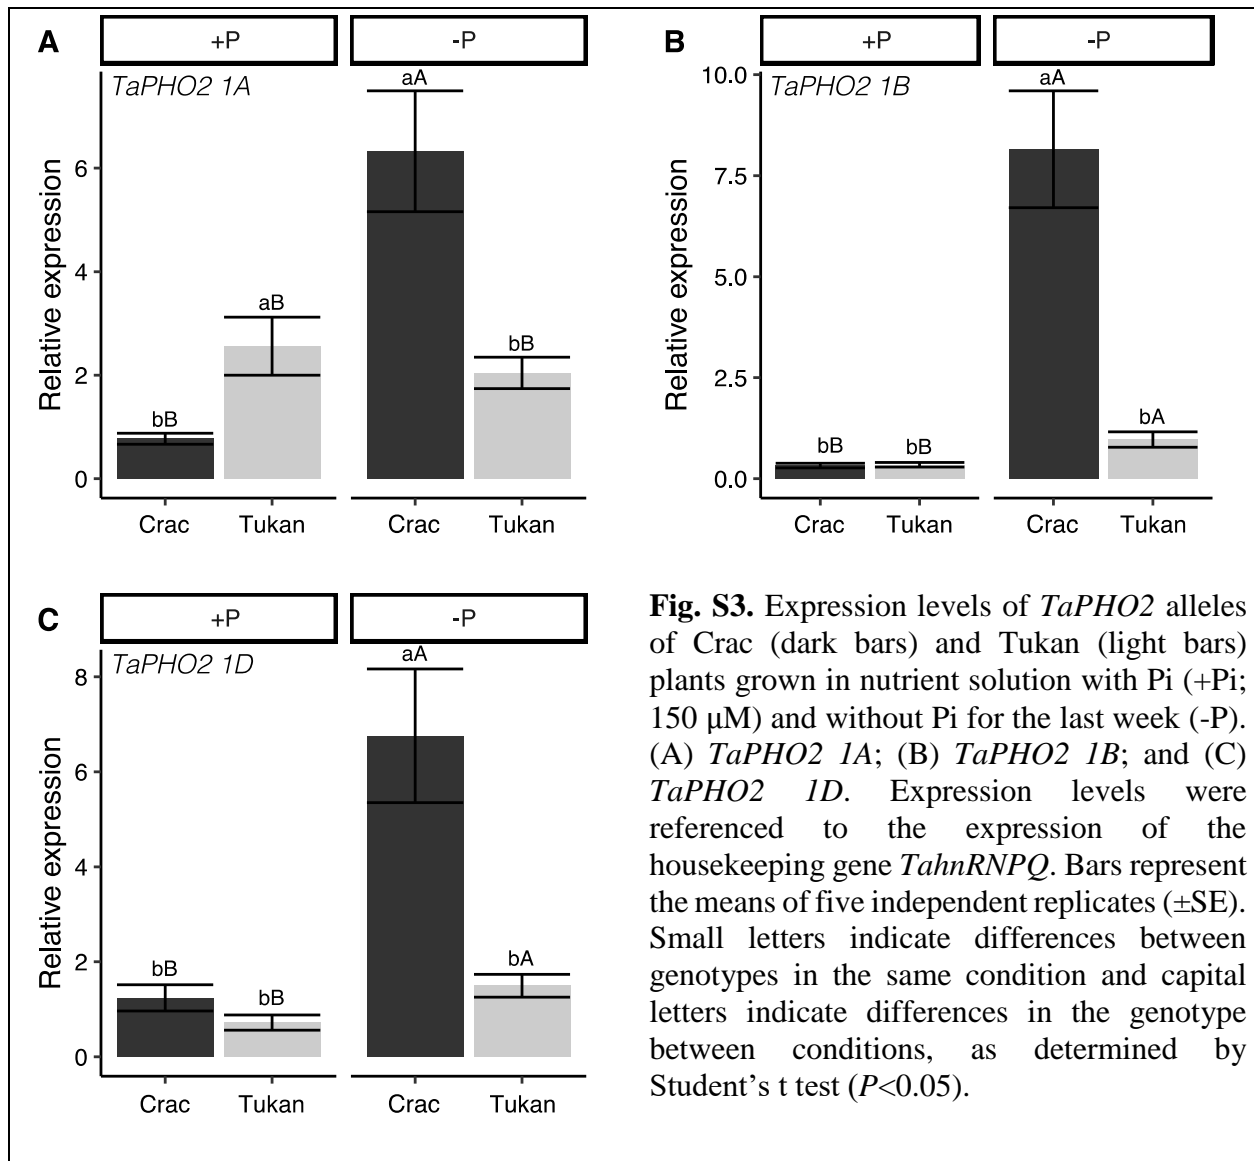

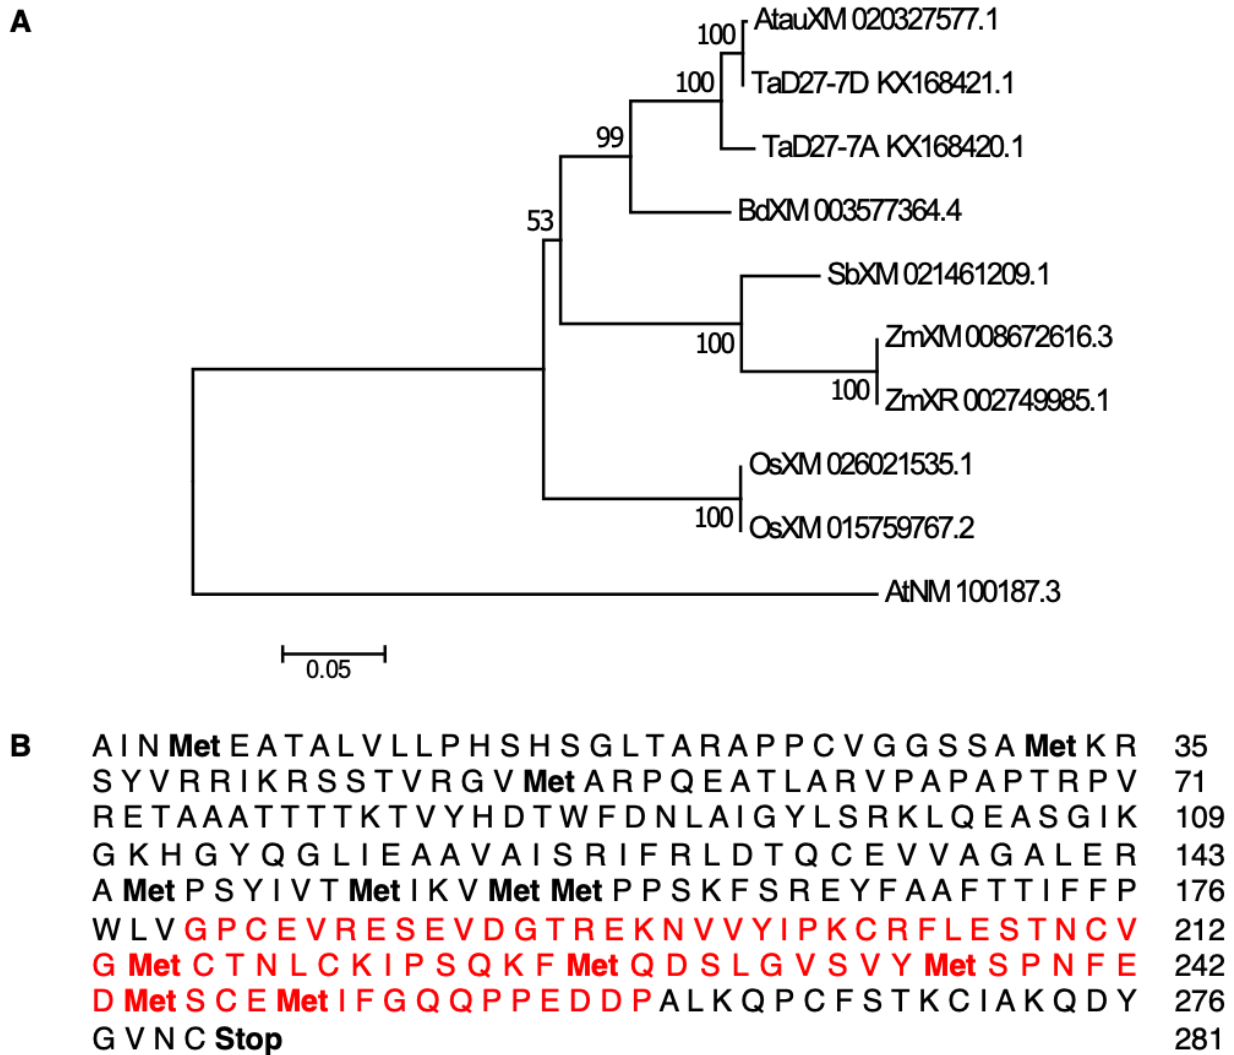

**Fig. S4.** Phylogenetic analysis of *D27* sequences from *Aegilops tauschii* (Atau), *Arabidopsis thaliana* (At), *Brachypodium distachyon* (Bd), *Oryza sativa* (Os), *Sorghum bicolor* (Sb), *Zea mays* (Zm), and *Triticum aestivum* (A); and Amino acidic sequence of *TaD27* (B). In red, sequence encoding for DUF4033 superfamily. The tree was inferred using the Neighbor-Joining method (Saitou and Nei, 1987). The percentage of replicate trees in which the associated taxa clustered together in the bootstrap test (500 replicates) is shown next to the branches (Felsenstein, 2009). The tree is drawn to scale, with branch lengths in the same units as those of the evolutionary distances used to infer the phylogenetic tree. The evolutionary distances were computed using the Maximum Composite Likelihood method (Tamura *et al.*, 2004) and are in the units of the number of base substitutions per site. All positions containing gaps and missing data were eliminated. Evolutionary analyses were conducted in MEGA7 (Kumar *et al.*, 2016).

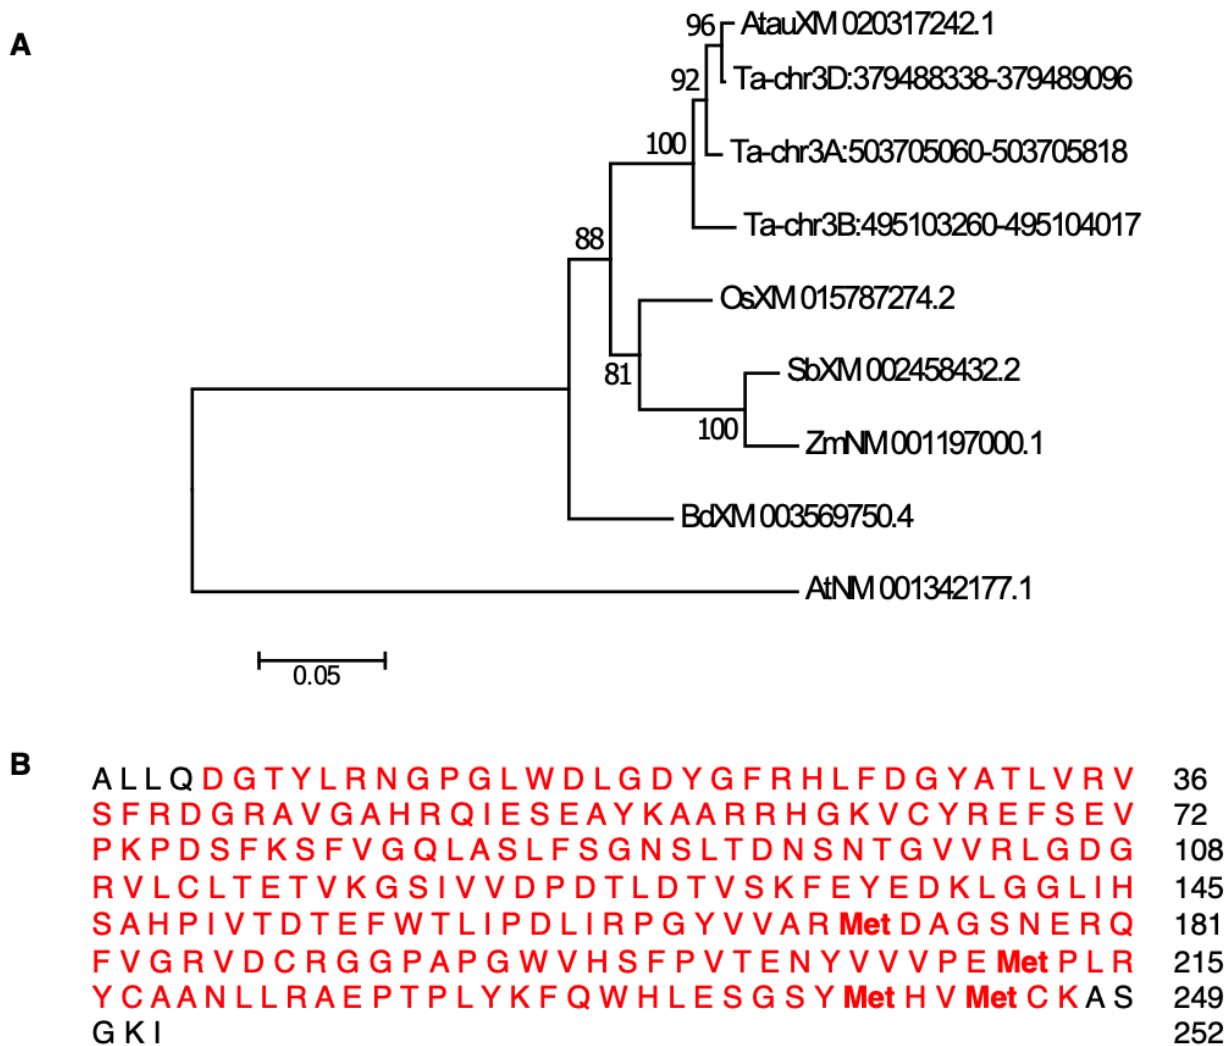

**Fig. S5.** Phylogenetic analysis of partial *CCD8* sequences from *Aegilops tauschii* (Atau), *Arabidopsis thaliana* (At), *Brachypodium distachyon* (Bd), *Oryza sativa* (Os), *Sorghum bicolor* (Sb), *Zea mays* (Zm), and *Triticum aestivum* (A); and Partial amino acidic sequence of *TaCCD8* (B). In red sequence encoding for RPE65 superfamily. The tree was constructed as described in Figure S4.



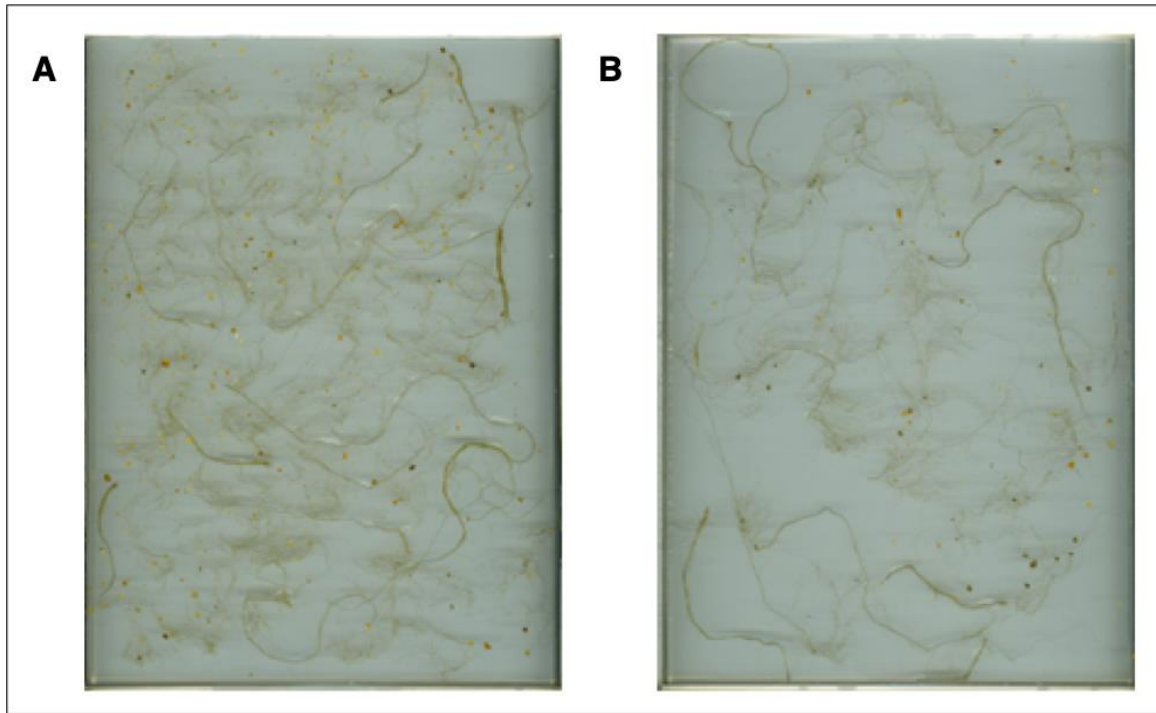

**Fig. S6.** Transparent tray containing the root systems of a single Crac (A) and Tukan (B) plant grown for 5 weeks in pots filled with sand/vermiculite and exposed to low Pi stress ( $10 \mu\text{M}$ ). Root systems from individual plants were cut before the analysis in order to minimize overlaps in the scanner.

## REFERENCES

- Felsenstein J.** 2009. Confidence Limits on Phylogenies : An Approach Using the Bootstrap. *Evolution* **39**, 783–791.
- Grün A, Buchner P, Broadley MR, Hawkesford MJ.** 2017. Identification and expression profiling of Pht1 phosphate transporters in wheat in controlled environments and in the field. *Plant Physiology* **173**, 1–16.
- Kumar S, Stecher G, Tamura K.** 2016. MEGA7: Molecular Evolutionary Genetics Analysis Version 7.0 for Bigger Datasets. *Molecular biology and evolution* **33**, 1870–1874.
- Ouyang X, Hong X, Zhao X, Zhang W, He X, Ma W, Teng W, Tong Y.** 2016. Knock out of the PHOSPHATE 2 Gene TaPHO2-A1 Improves Phosphorus Uptake and Grain Yield under Low Phosphorus Conditions in Common Wheat. *Scientific Reports* **6**, 1–11.
- Sadzawka A, Carrasco MA, Gez R, Mora MDLL, Flores H, Neaman A.** 2006. Métodos de análisis recomendados para los suelos de Chile. Revision 2006. Serie Actas-Instituto de Investigaciones Agropecuarias, 164.
- Saitou N, Nei M.** 1987. The neighbor-joining method: a new method for reconstructing phylogenetic trees. *Molecular Biology and Evolution* **4**, 406–425.
- Tamura K, Nei M, Kumar S.** 2004. Prospects for inferring very large phylogenies by using the neighbor-joining method. *Proceedings of the National Academy of Sciences*.
